# Supplementary material for: Enhancing Clinical Documentation Workflow with Ambient Artificial Intelligence: Clinician Perspectives on Work Burden, Burnout, and Job Satisfaction
Source: bioRxiv or medRxiv preprint supplement (doi:10.1101/2024.08.12.24311883), 2024-08-26
Supplement: Supplementary file [file media-2.pdf]

# Abridge Post-Survey

A A A

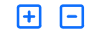

Please complete the survey below.

Thank you!

Please provide your name.

\* must provide value

What is your current documentation workflow in O2?  
(Please select all that apply.)

\* must provide value

- ☐ Student Documentation
- ☐ Resident Documentation
- ☐ Manual Typing
- ☐ Templates & Dotphrases
- ☐ Dragon Dictation to Desktop
- ☐ Dragon Dictation to Haiku/Canto
- ☐ In-Person Scribe
- ☐ DAX
- ☐ Abridge
- ☐ Other

Abridge has made my current documentation workflow  
easy to use for patient visits. (Please select one.)

\* must provide value

- ☐ Strongly Agree
- ☐ Agree
- ☐ Neither Agree nor Disagree
- ☐ Disagree
- ☐ Strongly Disagree
- ☐ Not Relevant to My Experience

**With Abridge, I could complete the note before the next patient visit. (Please select one.)**

\* must provide value

- ☐ Strongly Agree
- ☐ Agree
- ☐ Neither Agree nor Disagree
- ☐ Disagree
- ☐ Strongly Disagree
- ☐ Not Relevant to My Experience

**Abridge has improved my patient care by decreasing the documentation burden. (Please select one.)**

\* must provide value

- ☐ Strongly Agree
- ☐ Agree
- ☐ Neither Agree nor Disagree
- ☐ Disagree
- ☐ Strongly Disagree
- ☐ Not Relevant to My Experience

**Abridge has decreased the time I spend documenting outside of clinical hours (ie, after hours, non-clinic days). (Please select one.)**

\* must provide value

- ☐ Strongly Agree
- ☐ Agree
- ☐ Neither Agree nor Disagree
- ☐ Disagree
- ☐ Strongly Disagree
- ☐ Not Relevant to My Experience

**Abridge has decreased the stress of documentation. (Please select one.)**

\* must provide value

- ☐ Strongly Agree
- ☐ Agree
- ☐ Neither Agree nor Disagree
- ☐ Disagree

- ☐ Strongly Disagree
- ☐ Not Relevant to My Experience

**Abridge has decreased my risk for burnout due to documentation. (Please select one.)**

\* must provide value

- ☐ Strongly Agree
- ☐ Agree
- ☐ Neither Agree nor Disagree
- ☐ Disagree
- ☐ Strongly Disagree
- ☐ Not Relevant to My Experience

**Abridge has improved the quality of my documentation. (Please select one.)**

\* must provide value

- ☐ Strongly Agree
- ☐ Agree
- ☐ Neither Agree nor Disagree
- ☐ Disagree
- ☐ Strongly Disagree
- ☐ Not Relevant to My Experience

**Abridge has increased my satisfaction at work. (Please select one.)**

\* must provide value

- ☐ Strongly Agree
- ☐ Agree
- ☐ Neither Agree nor Disagree
- ☐ Disagree
- ☐ Strongly Disagree
- ☐ Not Relevant to My Experience

**How likely are you to recommend Abridge to a friend or colleague? (*Please select one.*)**

\* must provide value

- ☐ Not Likely
- ☐ Somewhat Likely
- ☐ Very Likely

**I feel that I could add at least one more patient encounter to my clinic session if urgently needed. (*Please select one.*)**

\* must provide value

- ☐ Strongly Agree
- ☐ Agree
- ☐ Neither Agree nor Disagree
- ☐ Disagree
- ☐ Strongly Disagree
- ☐ Not Relevant to My Experience

**Please share any additional comments on how Abridge has impacted you:**

**Please share any suggestions or idea for how to make Abridge even more valuable to you and/or your colleagues.**

**Submit**
